# Supplementary material for: Consumption of carotenoids not increased by bacterial infection in brown trout embryos (Salmo trutta)
Source: PLOS journal article supplement (doi:10.1371/journal.pone.0198834), 2018-06-13

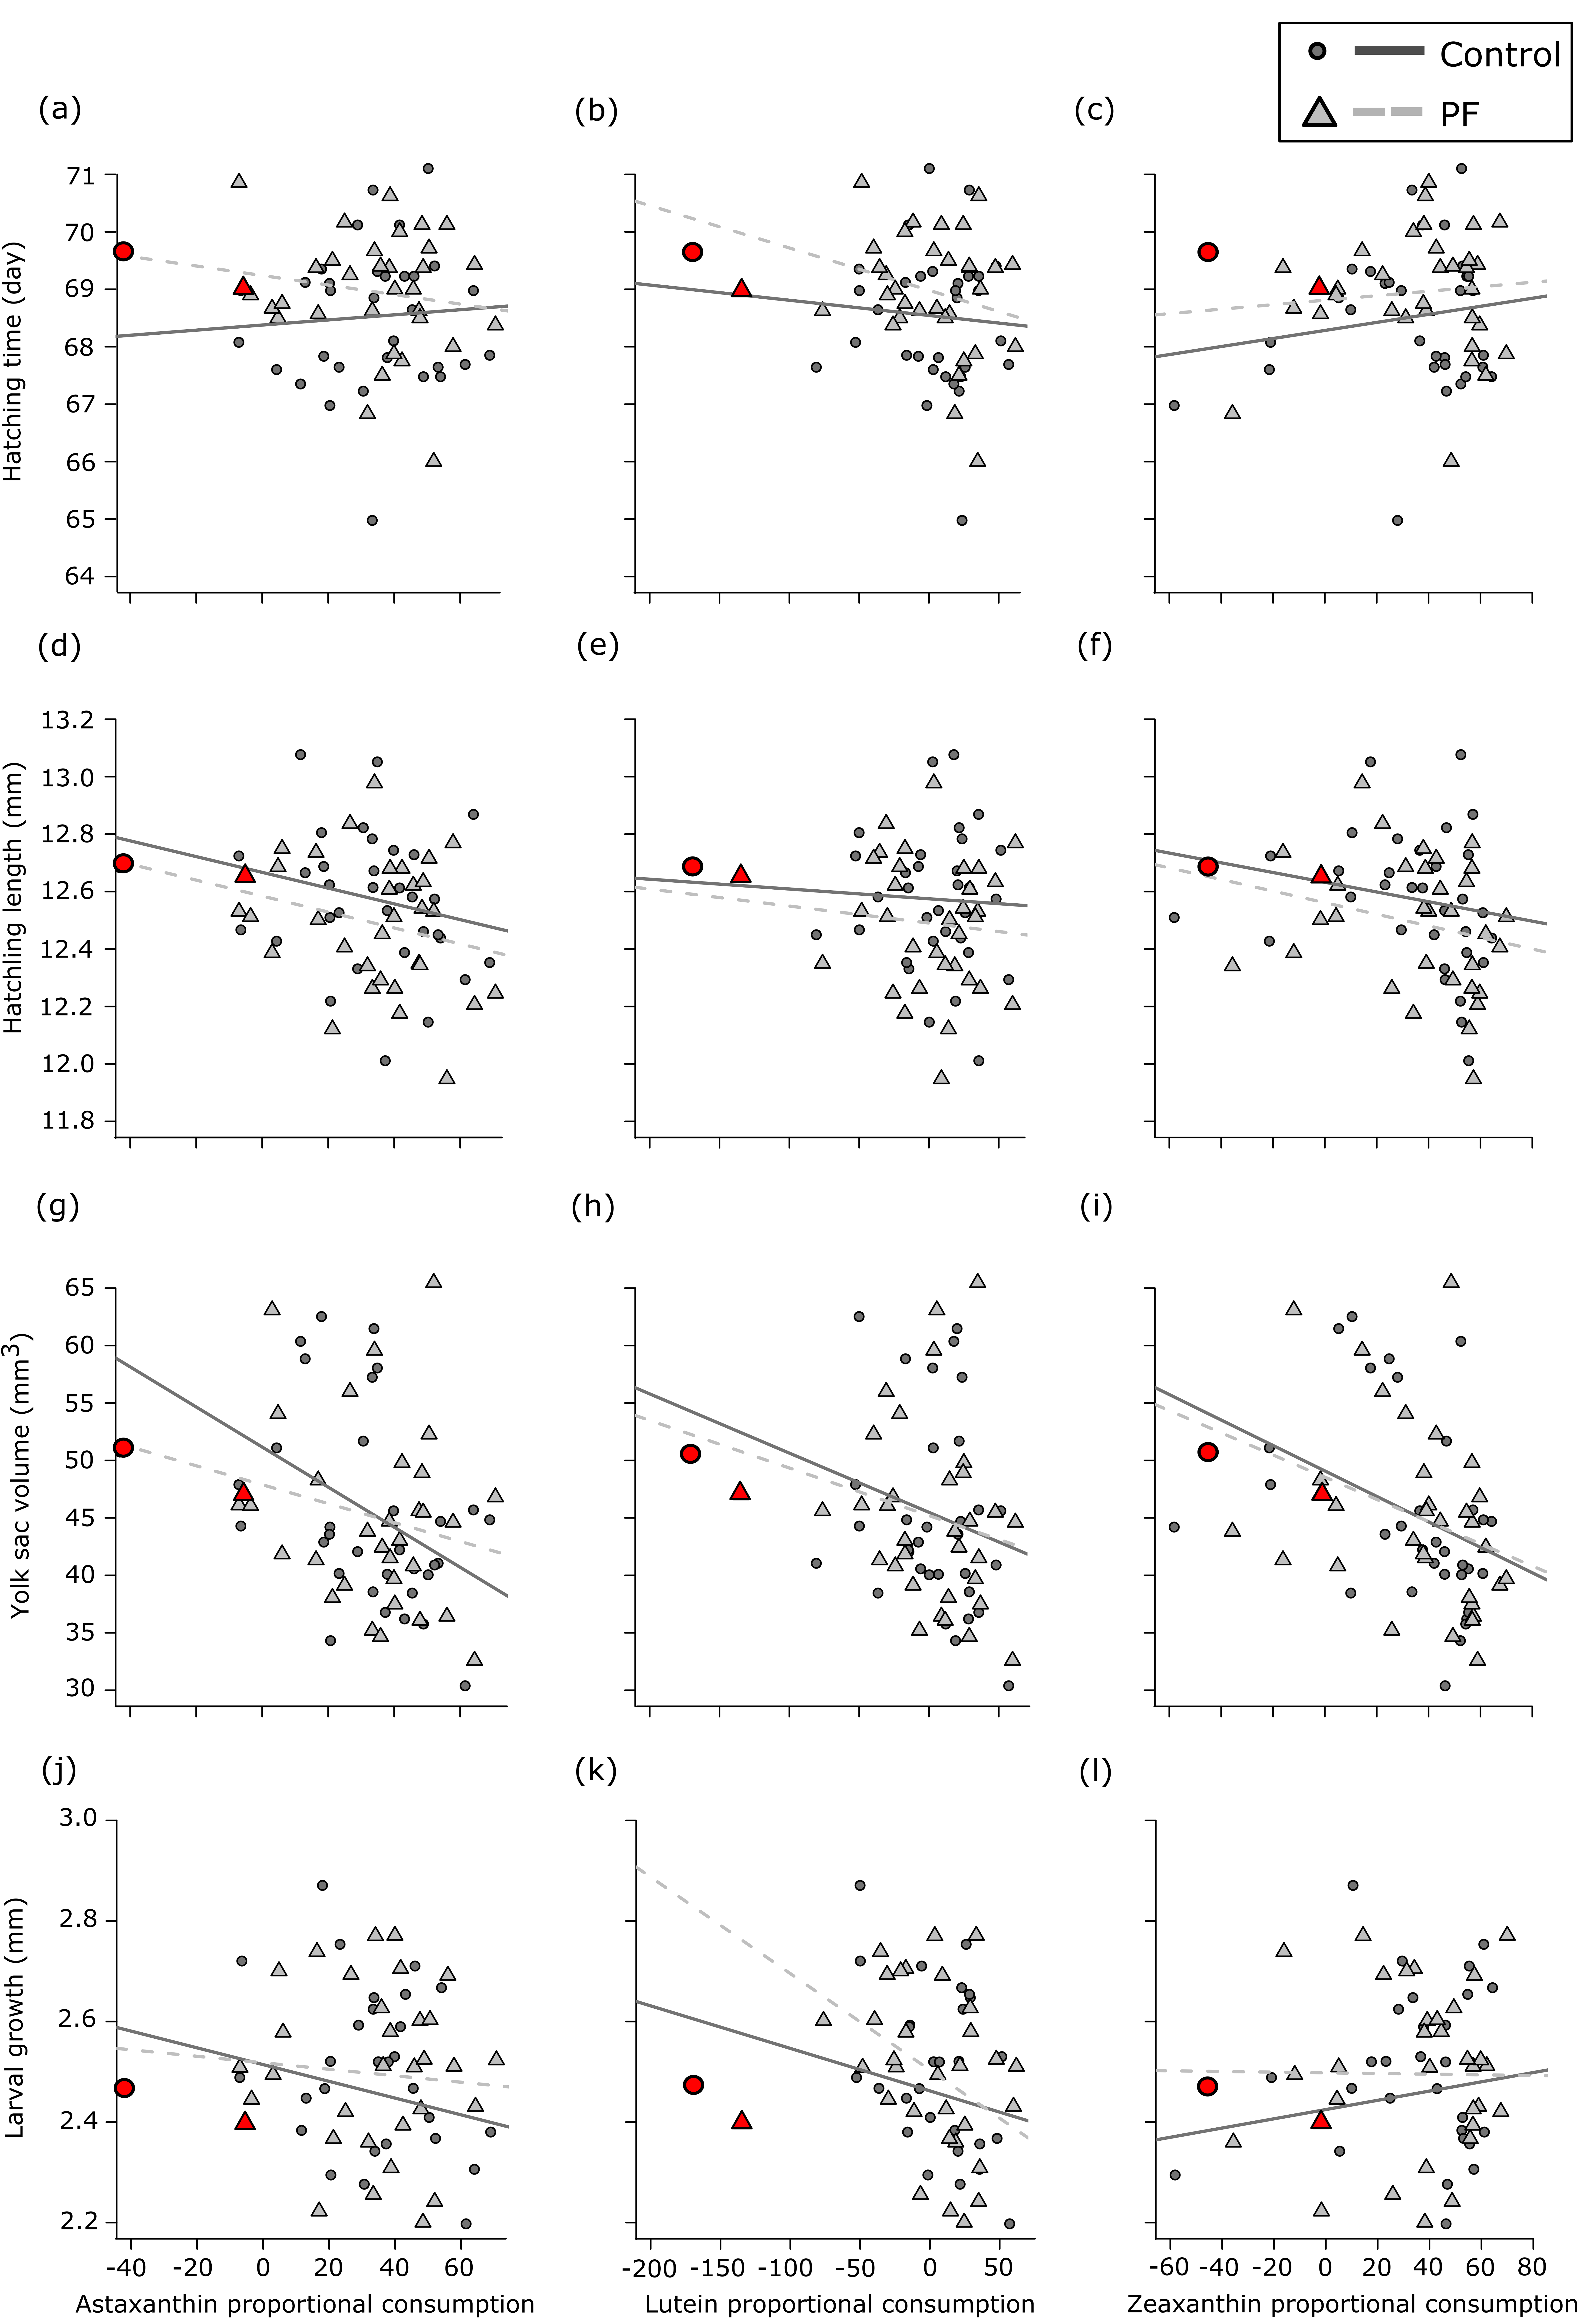

Supplement: S6 (10.1371/journal.pone.0198834.s006) [file journal.pone.0198834.s006]
